# Supplementary material
Source: publisher site journal article supplement (https://www.dovepress.com/article/602730)
Supplement: Supplementary file 1 [file 602730%20Supplementary%20Materials.docx]

**1. Reproducibility and Random Seed**

To ensure complete reproducibility of all analytical processes, a fixed global random seed was uniformly applied throughout the entire workflow, including data partitioning, resampling operations, feature selection, model training, hyperparameter optimization, and cross-validation procedures. This fixed randomization strategy eliminated random fluctuations in results and enabled consistent replication of all model training and validation outcomes.

**2. SMOTE for Class Imbalance**

To address inherent class imbalance among the three pathological categories (PGL, MIA, IAC) in the training dataset, the synthetic minority oversampling technique (SMOTE) was implemented to generate synthetic samples for minority classes. Importantly, SMOTE was applied strictly after train-test splitting to avoid data leakage and overestimation of model performance. Key parameters were set as follows: the number of neighboring samples used for synthetic sample generation was k_neighbors = 5; the sampling strategy was set to auto to automatically balance sample sizes across all categories; and a fixed random state was used to ensure stable and repeatable resampling results.

**3. Feature Preprocessing and Selection**

Prior to model construction, all radiomic features were subjected to standardized preprocessing. Z-score normalization was performed to transform feature values into a standardized distribution with a mean of 0 and a standard deviation of 1, thereby eliminating scaling effects between different features. Highly redundant features with a pairwise Pearson correlation coefficient |r| > 0.9 were removed to reduce dimensionality and model complexity. Feature selection was then conducted using a two-step sequential approach: the maximum relevance minimum redundancy (mRMR) algorithm was first used to retain highly representative and non-redundant features, followed by least absolute shrinkage and selection operator (LASSO) regression with 5-fold cross-validation to identify the most predictive subset of features for the final model.

**4. Model Hyperparameter Grids**

All machine learning models were constructed and optimized using 5-fold cross-validation with grid search to identify optimal hyperparameter combinations. The hyperparameter search spaces were set as follows:

- Logistic Regression: Regularization parameter C = [0.01, 0.1, 1, 10, 100]; penalty term = ['l1', 'l2']
- Random Forest: Number of trees n_estimators = [100, 200]; maximum tree depth max_depth = [3, 5, 10, None]
- Extra Trees: Number of trees n_estimators = [100, 200]; maximum tree depth max_depth = [3, 5, 10, None]
- XGBoost: Learning rate = [0.01, 0.05, 0.1]; maximum tree depth max_depth = [3, 5, 7]; number of trees n_estimators = [100, 200]
- LightGBM: Learning rate = [0.01, 0.05, 0.1]; maximum tree depth max_depth = [3, 5, 7]; number of trees n_estimators = [100, 200]
- Multilayer Perceptron (MLP): Hidden layer structures = [(64, 32), (128, 64)]; activation function = ['relu']; initial learning rate = [0.001]
